# Supplementary material for: Overexpression of ONAC054 Improves Drought Stress Tolerance and Grain Yield in Rice
Source: MDPI journal article supplement (doi:10.3390/crops2040027), 2022-10-20
Supplement: s1 [file s1]

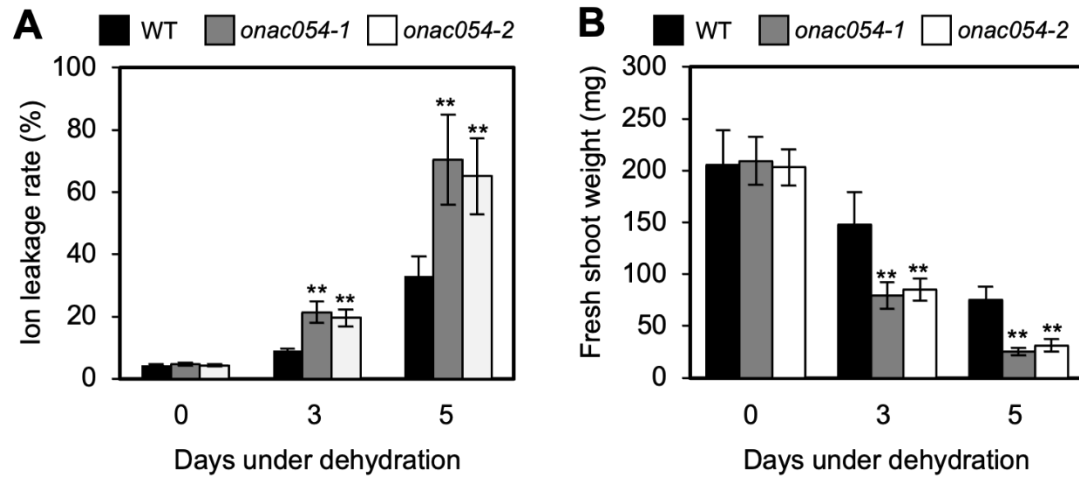

**Figure S1.** Drought stress sensitive phenotypes of two rice *onac054* mutants. (**A**, **B**) Changes in the ion leakage rate (**A**) and fresh shoot weight (**B**) of Dongjin (wild type; WT), *onac054-1*, and *onac054-2* seedlings during 5 days of dehydration stress. Data represent the mean  $\pm$  standard deviation (SD;  $n = 6$  samples). Asterisks (\*\* $P < 0.01$ ) indicate significant differences between the WT and other genotypes.

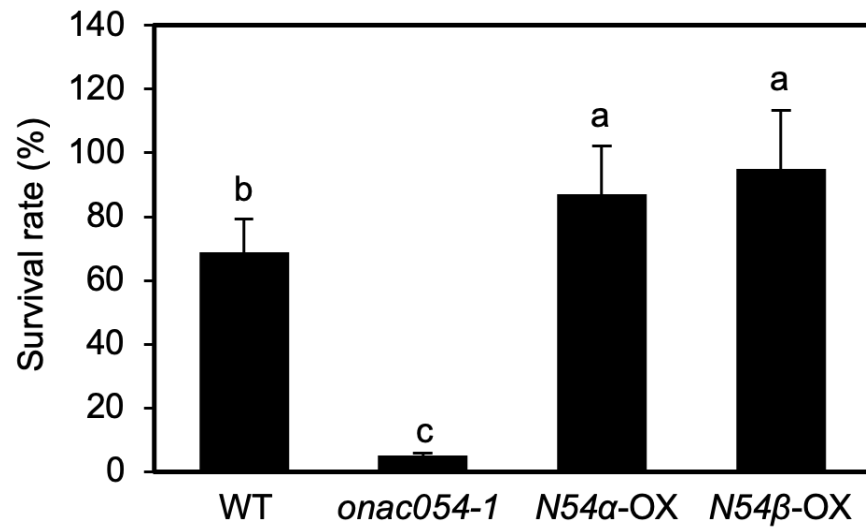

**Figure S2.** Survival rate of wild type (WT), *onac054-1*, and *ONAC054-OX* seedlings after dehydration. WT, *onac054-1*, *ONAC054α-OX* (*N054α-OX*), and *ONAC054β-OX* (*N054β-OX*) seedlings were grown in soil under normal growth conditions for 14 days, and then subjected to dehydration for 5 days. Subsequently, the seedlings were rehydrated for 3 days, and their survival rate was determined. Data represent the mean  $\pm$  SD of four independent experiments, with each experiment containing approximately 20 seedlings of each genotype. Different lowercase letters above the bars indicate significant differences ( $P < 0.05$ ; Tukey's multiple comparison test).

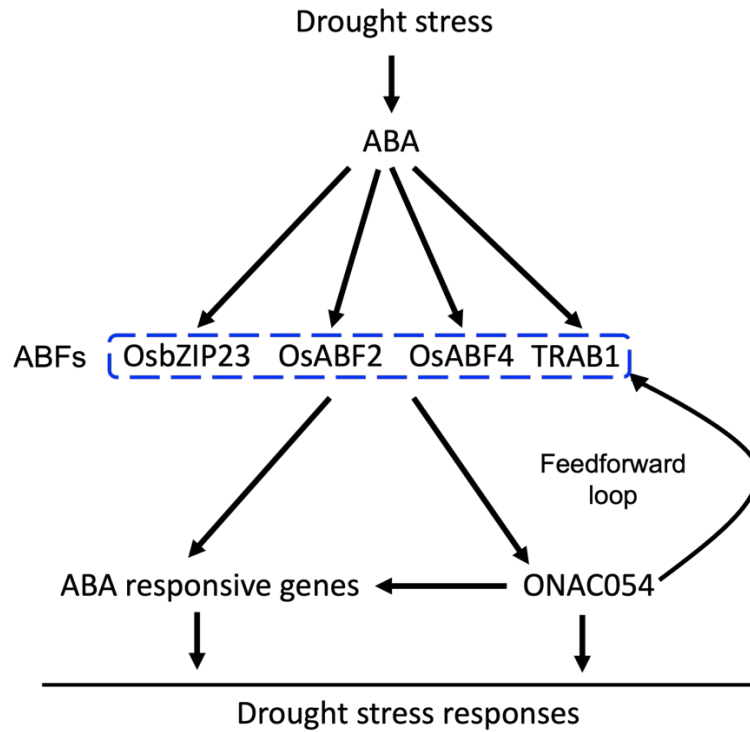

**Figure S3.** Model depicting the ONAC054-mediated drought stress responses in rice. Under drought stress conditions, the ABFs including OsbZIP23, OsABF2, OsABF4, and TRAB1 are induced as the accumulation of ABA increases. These ABFs directly activate the expression of *ONAC054*. On the other hand, ONAC054 also directly activates *TRAB1* expression and indirectly activates other *ABF* genes, thereby forming coherent feedforward loops to activate ABA and drought stress responses.

**Table S1.** Primers used in this study.

| Gene                            | Forward primer (5'→3')          | Reverse primer (5'→3')          |
|---------------------------------|---------------------------------|---------------------------------|
| For cDNA cloning                |                                 |                                 |
| <i>TRAB1</i>                    | AAAGGATCCATGAACATGGACGAG<br>CT  | AAAAGGCCTTTACCAGGGACCTGTC<br>A  |
| <i>OsZIP23</i>                  | AAAGGATCCATGGATTTTCCGGGAG<br>G  | AAAAGGCCTTCACCATGGACCCGTC<br>A  |
| <i>OsABF2</i>                   | AAAGGATCCATGGAGTTGCCGGCGG<br>AT | AAAAGGCCTTCAGCATGGACCAGTC<br>A  |
| <i>OsABF4</i>                   | AAAGGATCCATGCTGACGGATAGGT<br>G  | AAAAGGCCTTCACCAGGGACCAGTC<br>AG |
| <i>OsABI5</i>                   | AAAGGATCCATGGCATCGGAGATGA<br>G  | AAAAGGCCTTCACCACATGCAGCTG<br>CC |
| For cloning of promoter regions |                                 |                                 |
| <i>TRAB1</i> promoter           | AAACTGCAGGGCCTCATCTTTTTAT<br>GC | AAAGTCGACCCCTCCCAGCGTGCTC<br>TG |
| <i>ONAC054</i> promoter         | AAACTGCAGTCATTGCATACCTAGC<br>TA | AAAGTCGACATGCTTCCTCTAGCCT<br>T  |
| For ChIP-qPCR                   |                                 |                                 |
| pro <i>TRAB1</i> -a             | GGCCTCATCTTTTTATGCTTAT          | TTGACATTAATATGAATGTAGGAA        |
| pro <i>TRAB1</i> -b             | CTACATTCATATTAATGTCAAT          | CGCTATCCATCTGCTGGCAGAT          |
| pro <i>TRAB1</i> -c             | TCTGCCAGCAGATGGATAGCT           | ACCTGGCTCCATTTGTTCAAG           |
| pro <i>TRAB1</i> -d             | CTTGAACAAATCCAGCCAGGT           | CTACTGTTGAGTGACTCGCAGG          |
| pro <i>TRAB1</i> -e             | ACCTGCGAGTCACTCAACAG            | GTGGTGGTGGTGGTGATG              |
| pro <i>TRAB1</i> -f             | GATCCATCACCACCACCACC            | CTCCCAGCGAGCTCTGGAA             |
| For qPCR                        |                                 |                                 |
| <i>ONAC054a</i>                 | GGTTCGGGCAGATTTTCCGG            | GAGAGCGAGGTGAAGGGATC            |
| <i>ONAC054b</i>                 | GTTGGTGGTGAAGCAAACCT            | GTAAAGCCACCATCCACCAT            |
| <i>OsABA1</i>                   | ATATCAGAAAAGGATGCTACTA          | TCCTCTTGCAGATTCATATGG           |
| <i>OsABA3</i>                   | TCCATGGGAGGATGCAATCG            | TACACTTGTTGCCCCACTTG            |
| <i>OsCYP707A6</i>               | AGATCGTCGGGGCGAGCGA             | ACCTGCTGCTGTGATGGTGC            |
| <i>OsCYP707A7</i>               | GAGATTGTTGGTTCCAGCGA            | TACGCCATTGTCGTCATTAT            |
| <i>OsLEA3</i>                   | GCCAAGCAGAAGACCGCC              | ACGGTACCTCTGCTCCCC              |
| <i>OsABI1</i>                   | TTCAGGACGGTGGGCTCCA             | TAGTTGTACGGAGTGCCACGT           |
| <i>OsABI2</i>                   | GTTAGGCAATGACTCAAGTG            | TTAGAGGAGCTGGAAGAGAA            |
| <i>OsABI3</i>                   | GTGATTTTGTTCGTTCAAACG           | CACCTTCACACCACGTATCA            |
| <i>OsABI4</i>                   | TGCTGTTCTTGTTGCAGCTG            | AAGCCCCACGCGGCCTC               |

|                 |                          |                       |
|-----------------|--------------------------|-----------------------|
| <i>OsABI5</i>   | CGAAGCTGAACTGAACTATC     | CTGGCTGCCACCCCTATTTG  |
| <i>OsZIP23</i>  | GATGGAATTGGAAGCTGAGG     | GTCCAACCTGTCTGGCTCATT |
| <i>OsABF1</i>   | CTCAAAGGAAATGGTTGTTCCAGT | CTACCACTCCATCGAGTTTGT |
| <i>OsABF2</i>   | GCTTATATAATGGAGTTGGAAG   | CATGGACCAGTCAGTGTTCTG |
| <i>OsABF4</i>   | CAAATGCTCAGCAAGTTGGA     | TGAAGCATGCTGACAAGACC  |
| <i>TRAB1</i>    | GAGGAAATTATGGAAATGCAG    | TTACCAGGGACCTGTCAATG  |
| <i>OsRAB16a</i> | TCAAGGAGAAGATCAAGGA      | ATCTTGTCCATGATGCCCTT  |
| <i>OsUBQ10</i>  | ACCACTTCGACCGCCACTACT    | ACGCCTAAGCCTGCTGGTT   |

---
